# Supplementary material for: Modulating the electronic structure of a hydrogen-bonded organic framework to enhance uranium removal via the hydrogen evolution reaction
Source: Royal Society of Chemistry journal article supplement (doi:10.1039/d4qi02743d), 2025-01-01
Supplement: d4qi02743d1.pdf [file d4qi02743d1.pdf]

**Modulating the electronic structure of a hydrogen-bonded organic framework to improve the uranium removal by enhancing hydrogen evolution reaction**

Qingsong Zhang <sup>a, \*</sup>, Yuyang Miao <sup>a</sup>, Yang Xiao <sup>b, \*</sup>, Jianwei Hu <sup>a</sup>, Haiyi Gong <sup>a</sup>,  
Qingyi Zeng <sup>a, \*</sup>

<sup>a</sup> School of Resource & Environment and Safety Engineering, University of South China, Hengyang 421001, China

<sup>b</sup> School of Nuclear Science and Technology, University of South China, Hengyang 421001, China

---

\* Corresponding authors.

*E-mail addresses:* qszhang@usc.edu.cn (QS. Zhang); xiaoyang950529@163.com (Y. Xiao); qingyizeng@usc.edu.cn (QY. Zeng)

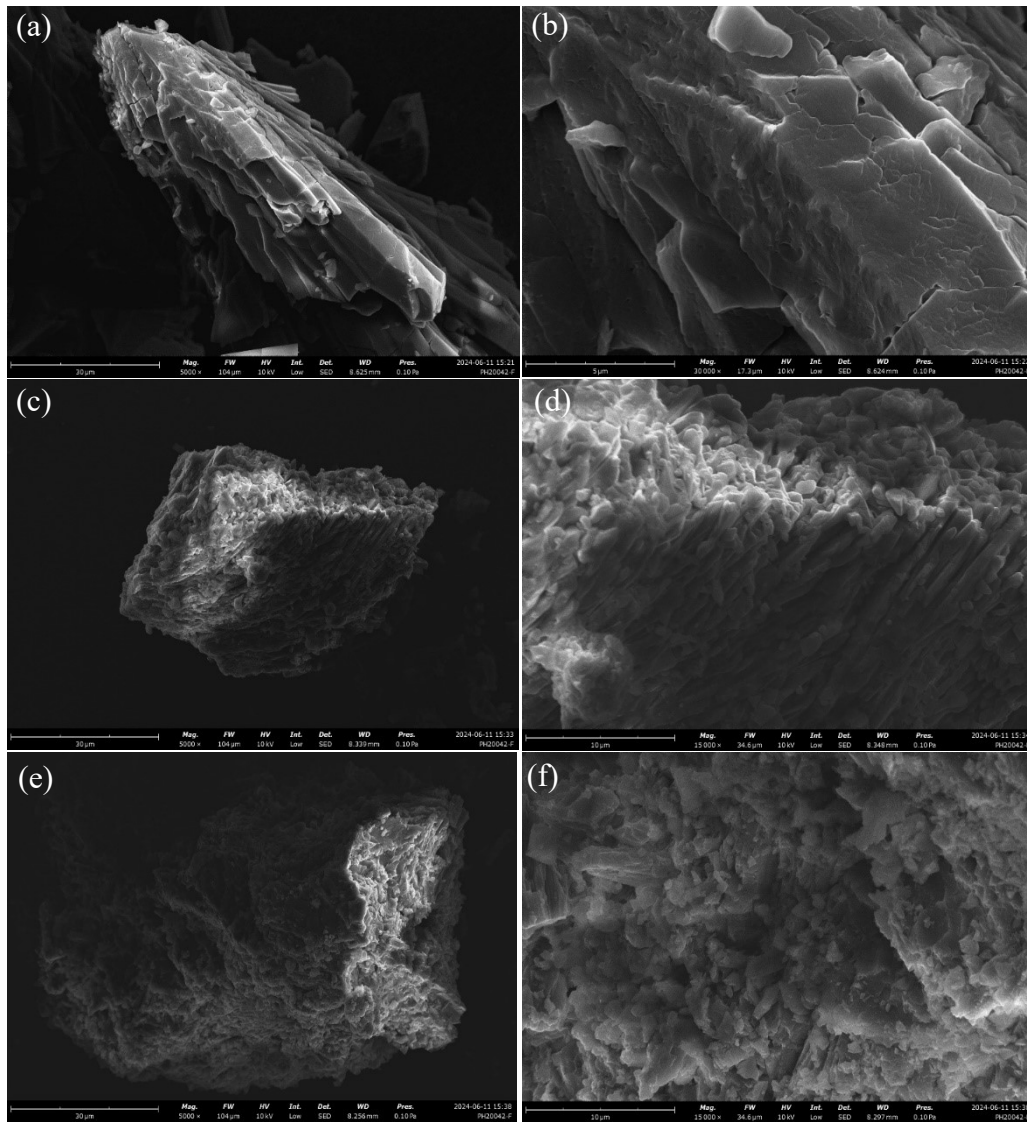

**Fig. S1.** SEM images of (a, b) Co-HOF; (c,d) Co<sub>9.5</sub>Ni<sub>0.5</sub>-HOF; (e, f) Co<sub>8</sub>Ni<sub>2</sub>-HOF.

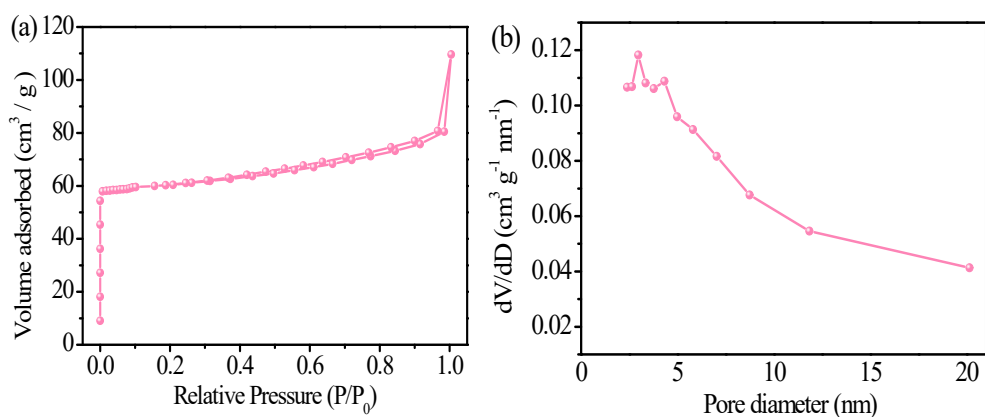

**Fig. S2.** (a) Nitrogen adsorption-desorption isotherms and (b) pore diameter distribution of Co-HOF.

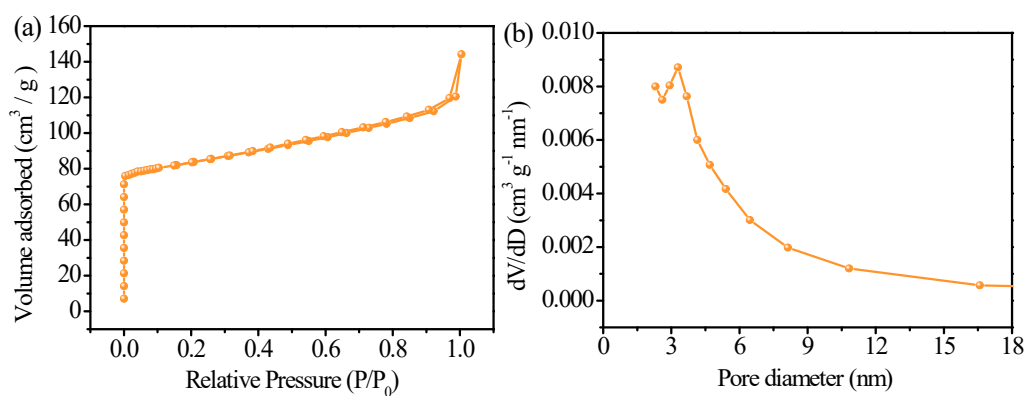

**Fig. S3.** (a) Nitrogen adsorption-desorption isotherms and (b) pore diameter distribution of  $\text{Co}_{0.5}\text{Ni}_{0.5}$ -HOF.

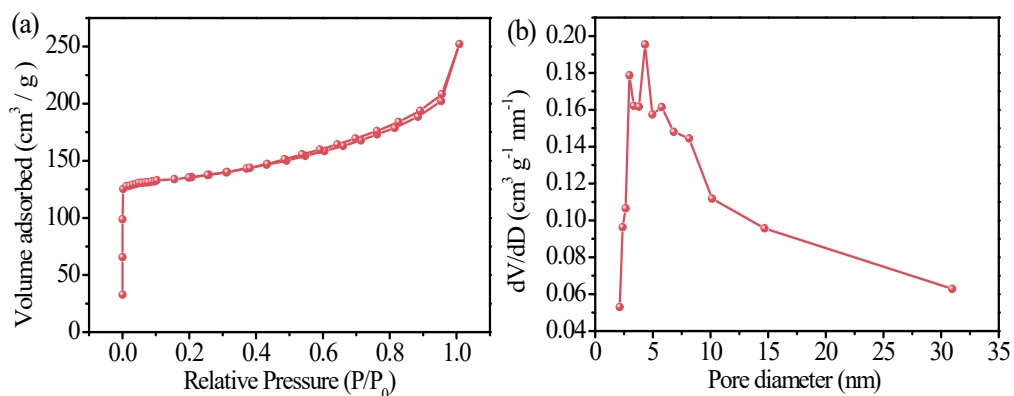

**Fig. S4.** (a) Nitrogen adsorption-desorption isotherms and (b) pore diameter distribution of  $\text{Co}_9\text{Ni}_1$ -HOF.

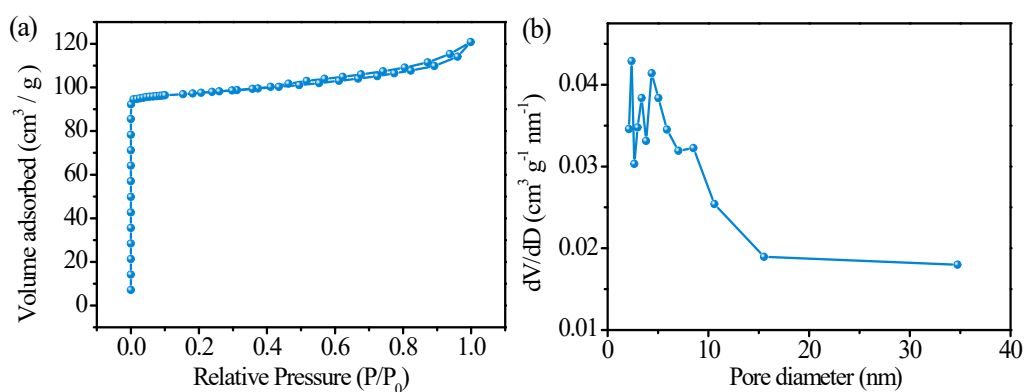

**Fig. S5.** (a) Nitrogen adsorption-desorption isotherms and (b) pore diameter distribution of  $\text{Co}_8\text{Ni}_2\text{-HOF}$ .

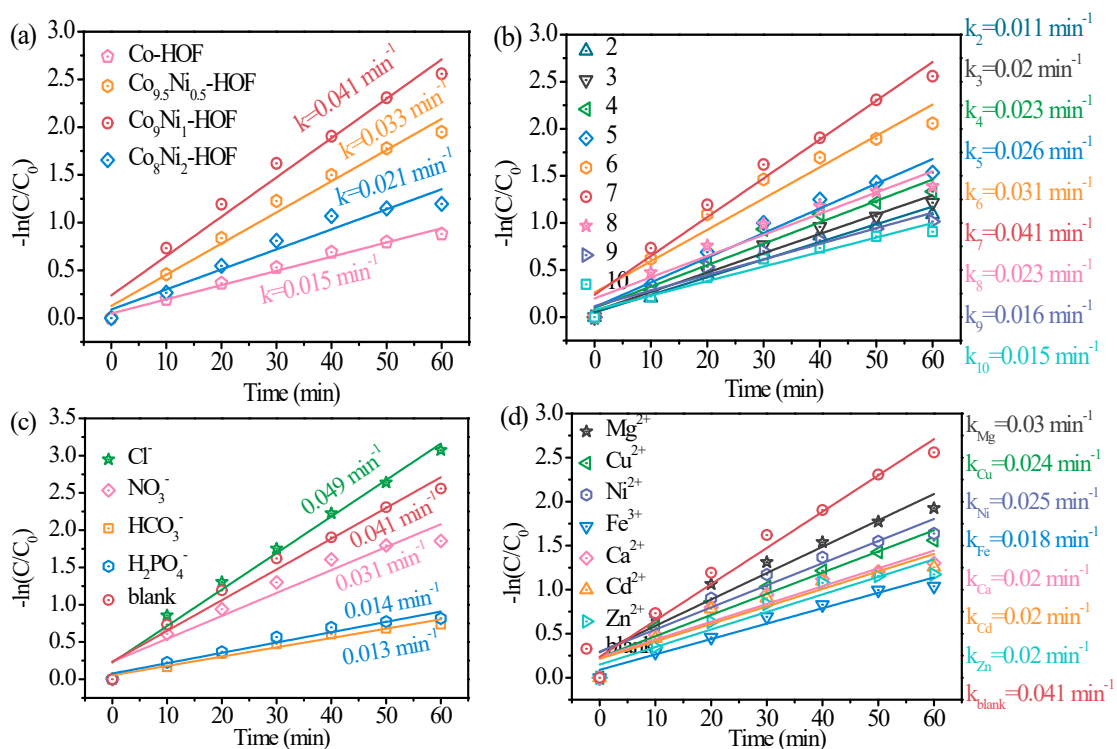

**Fig. S6.** (a) The kinetic rate constant of the  $\text{UO}_2^{2+}$  removal over different photocatalysts; (b-d) The kinetic rate constant of the  $\text{UO}_2^{2+}$  removal for different effects, (b) pH; (c) anions and (d) cations.

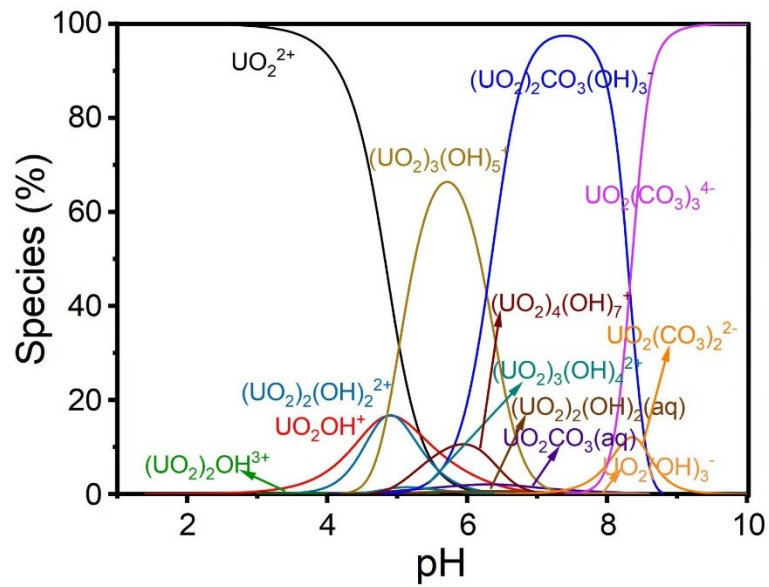

**Fig. S7.** Simulation of U(VI) speciation as a function with different pH.

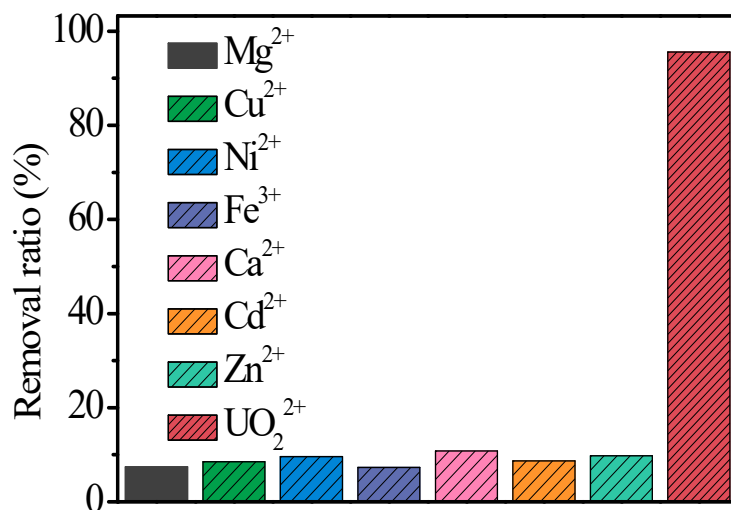

**Fig. S8.** Selective removal of coexistent ions on  $\text{Co}_9\text{Ni}_1\text{-HOF}$ .

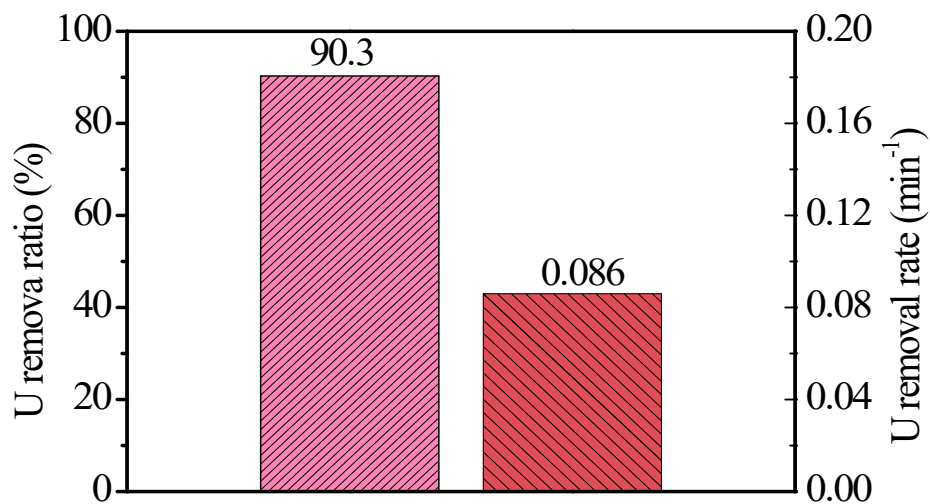

**Fig. S9.** The removal ratio and rate of U in simulated seawater for Co<sub>9</sub>Ni<sub>1</sub>-HOF

photocatalyst

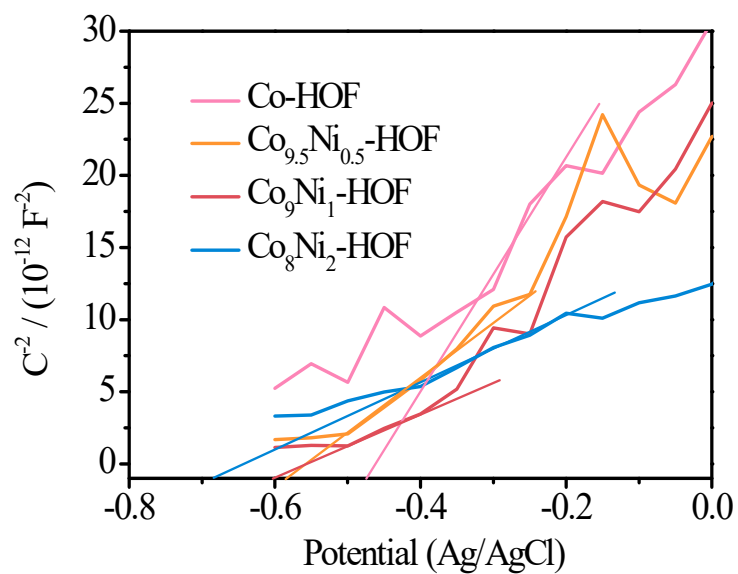

**Fig. S10.** Mott-Schottky plots of the various samples.

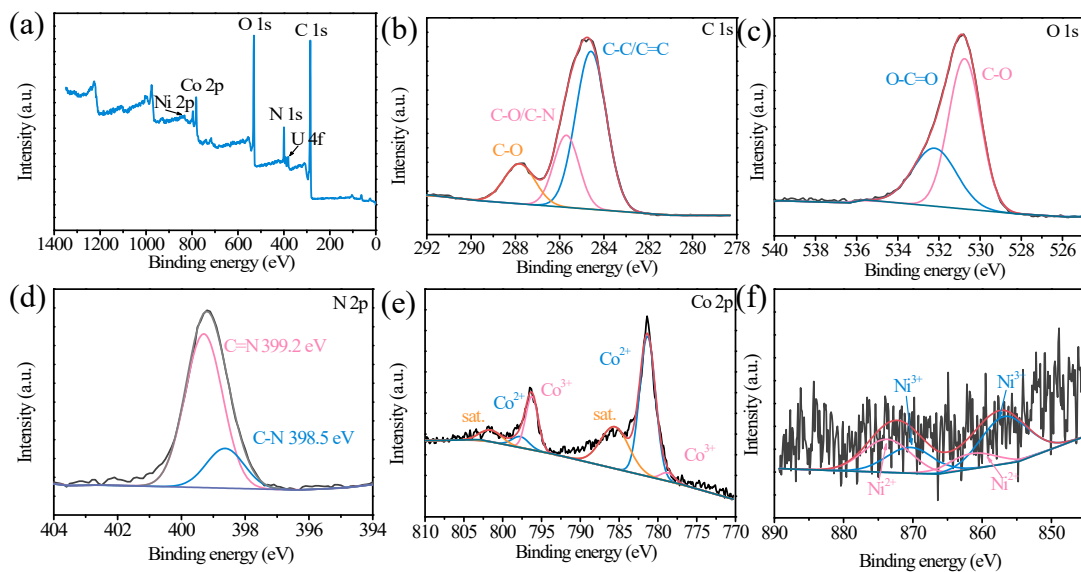

**Fig. S11.** (a) Full XPS region of  $\text{Co}_9\text{Ni}_1\text{-HOF}$ ; high-resolution XPS spectra of (b) C

1s, (c) C 1s, (d) N 2p, (e) Co 2p and (d) Ni 2p after uranium removal.

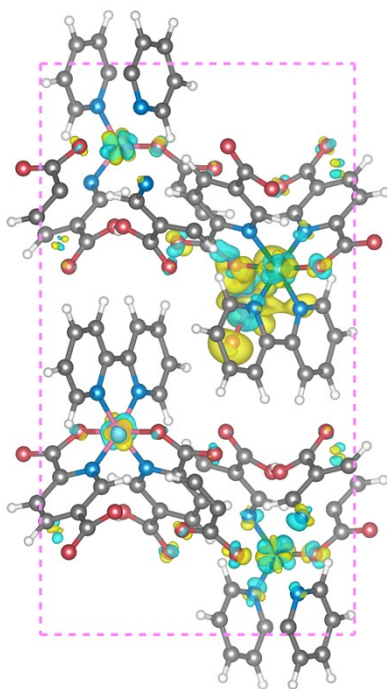

**Fig. S12.** Charge density differences of  $\text{UO}_2^{2+}$  adsorption on  $\text{NiCo-HOF}$ . Yellow indicates electron accumulation, and light blue indicates depletion.

**Table S1.** Surface and pore information of the samples.

| Samples                                  | Specific surface area<br>(m <sup>2</sup> /g) | Pore volume (cm <sup>3</sup> /g) | Pore diameter (nm) |
|------------------------------------------|----------------------------------------------|----------------------------------|--------------------|
| Co-HOF                                   | 191.62                                       | 0.137                            | 2.4                |
| Co <sub>9.5</sub> Ni <sub>0.5</sub> -HOF | 308.34                                       | 0.192                            | 2.83               |
| Co <sub>9</sub> Ni <sub>1</sub> -HOF     | 432.66                                       | 0.364                            | 3.67               |
| Co <sub>8</sub> Ni <sub>2</sub> -HOF     | 270.85                                       | 0.185                            | 2.86               |

**Table S2.** The ratio of different valence states over Co<sup>2+</sup>/Co<sup>3+</sup> and Ni<sup>3+</sup>/Ni<sup>2+</sup>

| Samples                              | Co <sup>2+</sup> /Co <sup>3+</sup> (2p <sub>1/2</sub> ) | Co <sup>2+</sup> /Co <sup>3+</sup> (2p <sub>3/2</sub> ) | Ni <sup>3+</sup> /Ni <sup>2+</sup> (2p <sub>1/2</sub> ) | Ni <sup>3+</sup> /Ni <sup>2+</sup> (2p <sub>3/2</sub> ) |
|--------------------------------------|---------------------------------------------------------|---------------------------------------------------------|---------------------------------------------------------|---------------------------------------------------------|
| Co-HOF                               | 1.006                                                   | 1.018                                                   | -                                                       | -                                                       |
| Co <sub>9</sub> Ni <sub>1</sub> -HOF | 1.008                                                   | 1.021                                                   | 1.002                                                   | 1.003                                                   |

**Table S3.** Comparison of HER activity with other materials.

| Materials                                                                                  | Overpotential<br>(mV) | Reference |
|--------------------------------------------------------------------------------------------|-----------------------|-----------|
| Mg <sub>0.99</sub> Ni <sub>0.01</sub> Ga <sub>0.01</sub> Fe <sub>1.99</sub> O <sub>4</sub> | -820                  | S1        |
| 2H-TaS <sub>2</sub>                                                                        | 575                   | S2        |
| Mo-doped SnS                                                                               | 377                   | S3        |
| Ni-SAO                                                                                     | 837.6                 | S4        |
| Pd@TiO <sub>2</sub> -H                                                                     | 430                   | S5        |
| PSS (BiW@PEPS)                                                                             | 361                   | S6        |



|                                                                    |       |           |
|--------------------------------------------------------------------|-------|-----------|
| <b>B, P and S-doped Ag<sub>2</sub>WO<sub>4</sub></b>               | 330   | S7        |
| <b>Ni/Ni<sub>3</sub>C/CdS</b>                                      | -1080 | S8        |
| <b>Cu-SnO<sub>2</sub>/ZIF-8</b>                                    | 364   | S9        |
| <b>Cl-doped CuO</b>                                                | 400   | S10       |
| <b>MoS<sub>2</sub>/BN/rGO</b>                                      | -422  | S11       |
| <b>CuO Nanoflowers</b>                                             | 1020  | S12       |
| <b>Ag@g-C<sub>3</sub>N<sub>4</sub>/r-GO</b>                        | 484   | S13       |
| <b>ZnO-Ti<sub>3</sub>C<sub>2</sub></b>                             | 495   | S14       |
| <b>MnTiO<sub>3</sub>/g-C<sub>3</sub>N<sub>4</sub></b>              | 357   | S15       |
| <b>Co<sub>0.6</sub>Cu<sub>0.4</sub>Fe<sub>2</sub>O<sub>4</sub></b> | -810  | S16       |
| <b>Tetra-carboxylic acid based MOF</b>                             | 391   | S17       |
| <b>Co<sub>9</sub>Ni<sub>1</sub>-HOF</b>                            | 355   | This work |

Reference:

- [S1] R. Jasrotia, A. Verma, J. Ahmed, V. Khanna, M. Fazil, S. M. Alshehri, S. Kumari, P. Kumar, T. Ahmad, A. Kandwal, Mg<sub>1-x</sub>Ni<sub>x</sub>Ga<sub>y</sub>Fe<sub>2-y</sub>O<sub>4</sub> nano catalysts for green hydrogen generation with highly efficient photo/electro catalytic water splitting applications, *Int. J. Hydrogen Energ.*, 2024, **52**, 1228–1240.
- [S2] E. Kovalska, P. K. Roy, N. Antonatos, V. Mazanek, M. Vesely, B. Wu, Z. Sofer, Photocatalytic activity of twist-angle stacked 2D TaS<sub>2</sub>, *npj 2D Mater. Appl.* 2021, **68**.
- [S3] S. R. Kadam, S. Ghosh, R. Bar-Ziv, M. Bar-Sadan, Structural transformation of SnS<sub>2</sub> to SnS by Mo doping produces electro/photocatalyst for hydrogen production, *Chem. Eur. J.*, 2020, **26**, 6679-6685.

- [S4] C. L. Wang, H. Yang, J. Du, S. Z. Zhan, Catalytic performance of a square planar nickel complex for electrochemical- and photochemical-driven hydrogen evolution from water, *Inorg. Chem. Commun.* 2021, **131**, 108780.
- [S5] C. Shu, H. Du, W. H. Pu, C. Z. Yang, J. Y. Gong, Trace amounts of palladium-doped hollow TiO<sub>2</sub> nanosphere as highly efficient electrocatalyst for hydrogen evolution reaction, *Int. J. Hydrogen Energ.* 2021, **46**, 1923-1933.
- [S6] R. Manikandan, S. Sekar, S. P. Mani, S. Lee, D. Y. Kim, S. Saravanan, Bismuth tungstate-anchored PEDOT: PSS materials for high performance HER electrocatalyst, *Int. J. Hydrogen Energ.* 2023, **48**, 11746-11753.
- [S7] M. M. Mohamed, M. Khairy, S. Eid, Phosphorous, boron and sulphur-doped silver tungstate-based nanomaterials toward electrochemical methanol oxidation and water splitting energy applications, *Int. J. Hydrogen Energ.* 2024, **50**, 1232–1245.
- [S8] F. Y. Liu, F. Chen, X. Li, A. R. Xu, Z. J. Li, Z. J. Si, Z. Chen, A novel ternary nano-photocatalyst (Ni/Ni<sub>3</sub>C/CdS) for HER and water purification with enhanced photocatalytic activity, *Chem. Eng. J.* 2023, **478**, 147242.
- [S9] D. D. Zhang, H. M. Yang, Y. P. Li, Z. F. Li, N. Gao, W. J. Zhou, Z. H. Liang, High-performance Photoelectrocatalytic Reduction of CO<sub>2</sub> by the hydrophilic–hydrophobic composite Cu-SnO<sub>2</sub>/ZIF-8, *Int. J. Electrochem. Sci.*, 2021, **16**, 150951.
- [S10] D. P. Jaihindh, P. Anand, R. S. Chen, W. Y. Yu, M. S. Wong, Y. P. Fu, Cl-doped CuO for electrochemical hydrogen evolution reaction and tetracycline photocatalytic degradation, *J. Environ. Chem. Eng.* 2023, **11**, 109852.
- [S11] S. Selvaraj, K. Natesan, P. B. Bhargav, A. Nafis, Revolutionizing water

treatment: Exploring the efficacy of MoS<sub>2</sub>/BN/rGO ternary nanocomposite in organic dye treated water for OER and HER applications. *J. Water Process Engineering*, 2023, **54**, 104033.

[S12] F. Naaz, A. Sharma, M. Shahazad, T. Ahmad, Hydrothermally derived hierarchical CuO nanoflowers as an efficient photocatalyst and electrocatalyst for hydrogen evolution, *ChemistrySelect* 2022, **7**, e202201800.

[S13] S. R. Gujjula, U. Pal, N. Chanda, S. Karingula, S. Chirra, S. Siliveri, S. Goskula, V. Narayanan, Versatile bifunctional Ag@g-C<sub>3</sub>N<sub>4</sub>/r-GO catalyst for efficient photoand electrocatalytic H<sub>2</sub> production, *Energy Fuels* 2023, **37**, 9722–9735.

[S14] B. Saini, Harikrishna K, D. Laishram, R. Krishnapriya, R. Singhal, R. K. Sharma, Role of ZnO in ZnO nanoflake/Ti<sub>3</sub>C<sub>2</sub> MXene composites in photocatalytic and electrocatalytic hydrogen evolution. *ACS Appl. Nano Mater.* 2022, **5**, 9319–9333.

[S15] F. Li, Y. Zhou, S. T. Xie, Z. L. Wu, Q. J. Wang, Y. N. An, H. H. Huang, Q. Y. He, F. Li, K. Y. Zhao, P. W. Wu, C. L. Yu, In-situ synthesis of 2D Z-scheme MnTiO<sub>3</sub>/g-C<sub>3</sub>N<sub>4</sub> heterostructure for efficient electrocatalytic hydrogen production, *J. Taiwan Inst. Chem. Eng.* 2023, **151**, 105085.

[S16] P. Kotwal, R. Jasrotia, A. V. Nidhi, J. Ahmed, S. Thakurf, A. Kandwal, M. Fazil, S. M. Alshehri, T. Ahmad, A. Verma, N. Sharma, R. Kumar, Photo/electrocatalytic green hydrogen production promoted by Ga modified Co<sub>0.6</sub>Cu<sub>0.4</sub>Fe<sub>2</sub>O<sub>4</sub> nano catalysts, *Environ. Res.* 2024, **241**, 117669.

[S17] Q. Qiu, T. Wang, L. H. Jing, K. Huang, D B. Qin, Tetra-carboxylic acid based metal-organic framework as a high-performance bifunctional electrocatalyst for HER

and OER, *Int. J. Hydrogen Energ.* 2020, **45**, 11077-11088.

**Table S4.** *k* values of the different samples.

| Samples         | Co-HOF | Co <sub>9.5</sub> Ni <sub>0.5</sub> -HOF | Co <sub>9</sub> Ni <sub>1</sub> -HOF | Co <sub>8</sub> Ni <sub>2</sub> -HOF |
|-----------------|--------|------------------------------------------|--------------------------------------|--------------------------------------|
| <b>k values</b> | 0.0027 | 0.0047                                   | 0.0068                               | 0.0031                               |
